# Supplementary material for: Patterns of genetic, phenotypic, and acoustic variation across a chiffchaff (Phylloscopus collybita abietinus/tristis) hybrid zone
Source: PubMed Central journal article supplement (PMC5383471; doi:10.1002/ece3.2782), 2017-03-02
Supplement: ECE3-7-2169-s001.pdf [file ECE3-7-2169-s001.pdf]

1 **Supplementary Figure S1.**

2 Approximate distribution ranges of *P. c. abietinus* (green) and *P. c. tristis* (yellow). Numbers  
 3 refer to sampling locations for all samples included in the study. Sample sizes for each  
 4 respective location are listed in the table. \* the same individual may be present in several  
 5 categories of characteristics.

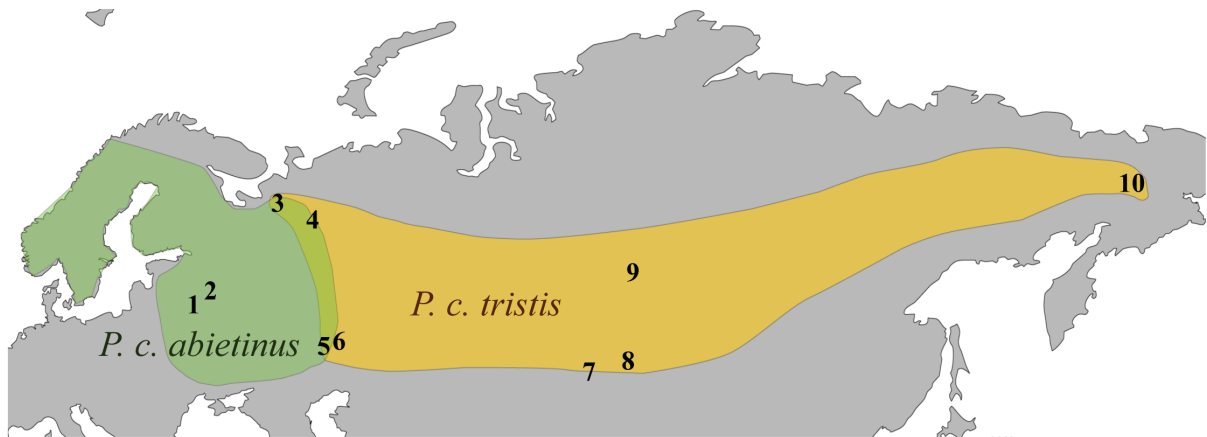

|    | Location                       | # of individuals * | Morphology (n=228) | Song (n=138) | mtDNA (n=192) | IDs of genotyped (NGS) birds |
|----|--------------------------------|--------------------|--------------------|--------------|---------------|------------------------------|
| 1  | Moscow, Vladimir region        | 10                 | 10                 | 10           | 6             | A6-A7                        |
| 2  | Kostroma region                | 6                  | 6                  | 6            | 5             | A1-A5                        |
| 3  | Arkhangelsk region             | 52                 | 51                 | 21           | 48            | N1-N10                       |
| 4  | Komi republic                  | 15                 | 12                 | 10           | 5             | -                            |
| 5  | Southern Ural National Reserve | 105                | 93                 | 44           | 75            | S1-S10                       |
| 6  | Ilmenski National Reserve      | 20                 | 20                 | 11           | 16            | -                            |
| 7  | Altai mountains                | 3                  | 3                  | 3            | 3             | T9                           |
| 8  | Sayan mountains                | 11                 | 11                 | 11           | 11            | T1-T4                        |
| 9  | Middle Enisey                  | 22                 | 22                 | 22           | 22            | T5-T8                        |
| 10 | Chukotka                       | 1                  | 1                  | -            | 1             | T10                          |

6  
7  
8  
9  
10  
11  
12

13 **Supplementary Figure S2.**

14 An illustration of the different steps in the generation and analysis of nuclear DNA.

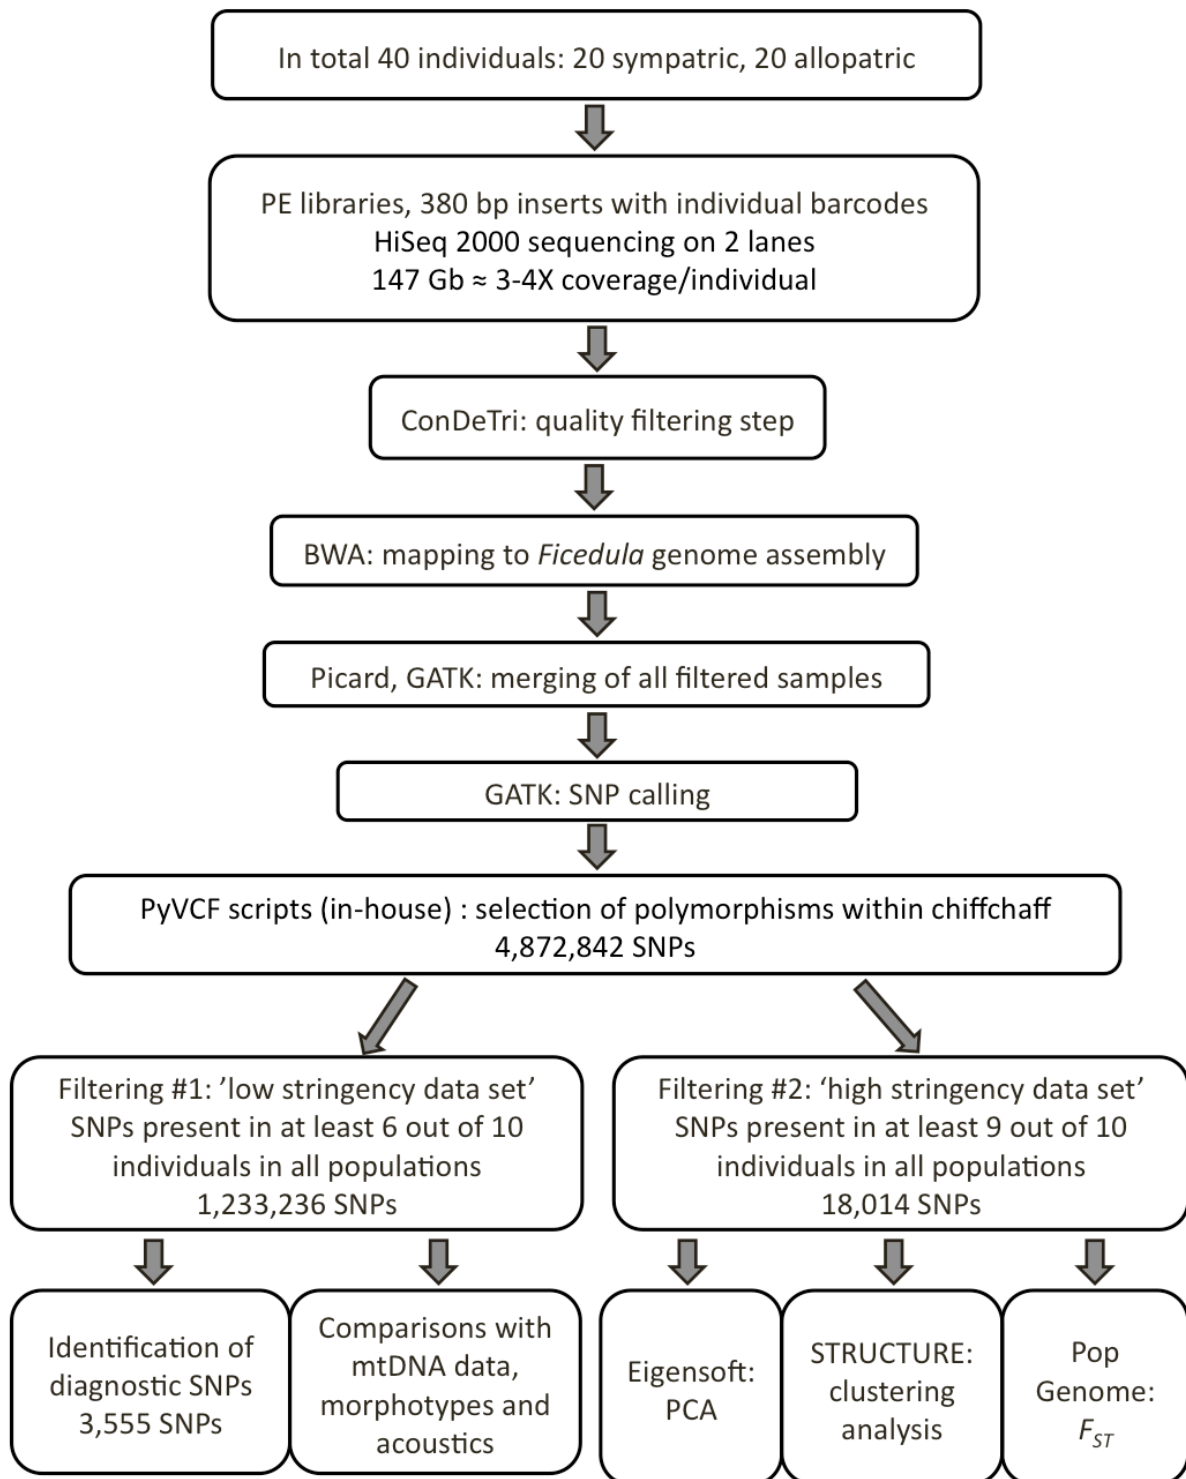

15

16
